# Supplementary material for: Multifaceted property tailoring of polyamide 6 by blending miscible and immiscible components: ternary blends of polyamide 6/polyethylene terephthalate/phenol novolac
Source: RSC Adv. 2020 Apr 17;10(26):15132–8. doi: 10.1039/d0ra02344b (PMC9052217; doi:10.1039/d0ra02344b)
Supplement: RA-010-D0RA02344B-s001 [file RA-010-D0RA02344B-s001.pdf]

## Supporting Information

# Multifaceted Property Tailoring of Polyamide 6 by Blending Miscible and Immiscible components: Ternary Blends of Polyamide 6/Polyethylene Terephthalate/Phenol Novolac

Takayuki Hirai<sup>a,\*</sup>, Yusaku Onochi<sup>b</sup>, Jumpei Kawada<sup>a</sup>

<sup>a</sup>Material and Processing Department, Polymer Processing and Mechanics Laboratories, Toyota Central R&D Laboratories, Inc., 41-1 Yokomichi, Nagakute 480-1192, Japan

<sup>b</sup>Lightweight Material Development Group, Organic Material Dept., Organic Material Engineering Div., Toyota Motor Corporation, Toyota-cho, Toyota, Aichi, Japan

\*Corresponding Author. Email: [hirai@mosk.tytlabs.co.jp](mailto:hirai@mosk.tytlabs.co.jp)

### Abbreviations

PA6: Polyamide 6, PBT: poly(butylene terephthalate), PEN: poly(ethylene naphthalate), PEI: poly(ether imide), PN: phenol novolac

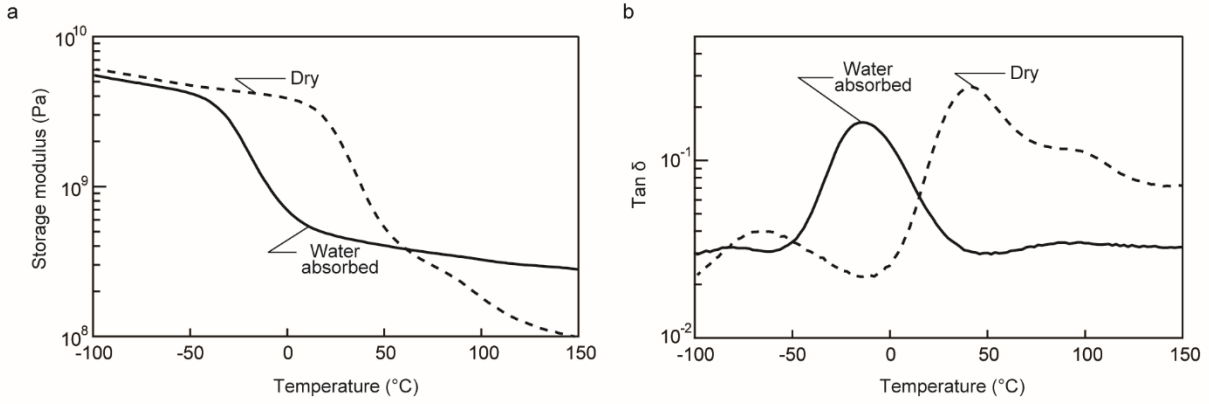

**Figure S1.** Temperature dependencies of (a) the storage modulus and (b)  $\tan \delta$  of PA6 in dry state after vacuum drying and water-absorbed state after reaching equivalent state in water. The water molecules act as a plasticizer and the glass transition temperature ( $T_g$ ) of PA6 is low-temperature shifted by water absorption.

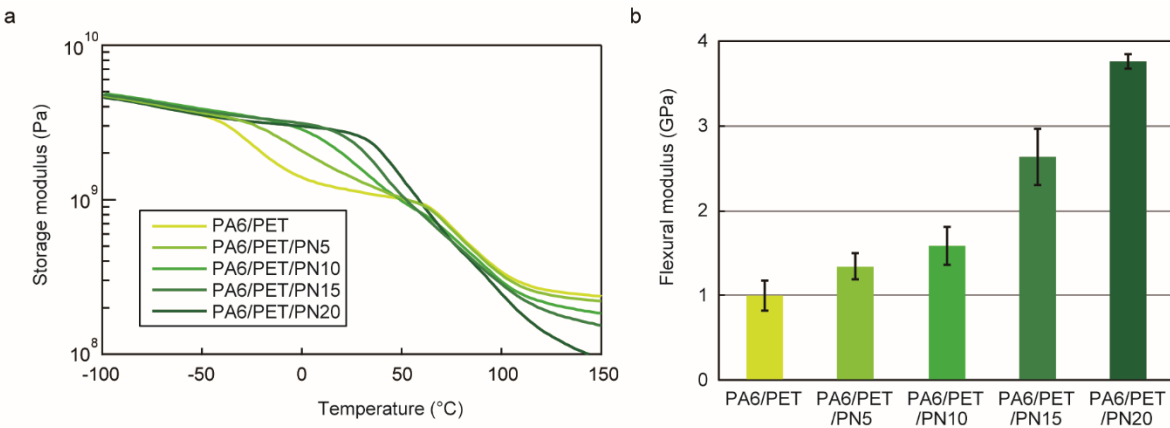

**Figure S2.** (a) Temperature dependencies of the storage modulus and (b) flexural moduli of PA6/PET and ternary blends in water-absorbed state (PA6/PET/PN5:PA6/PET including 5 wt% PN and PA6/PET/PN15: including 15 wt% PN.)

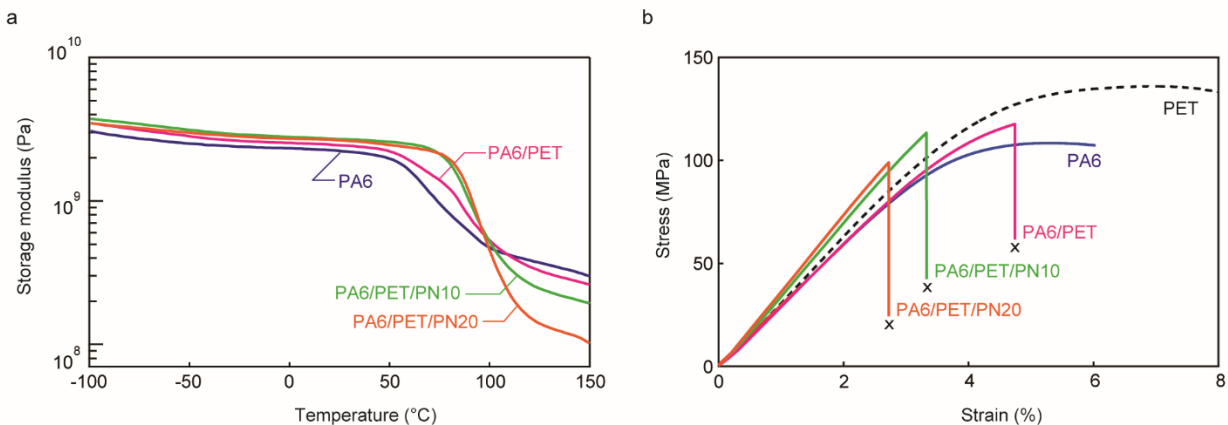

**Figure S3.** (a) Viscoelastic behavior and (b) stress–strain curves of PA6 and the polymer blends, which were obtained from vacuum-dried specimens.

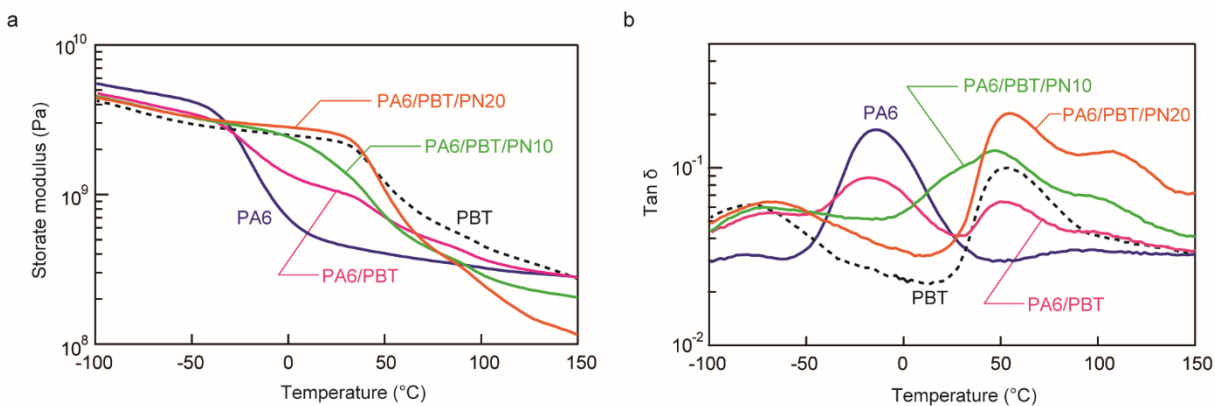

**Figure S4.** Viscoelastic behavior of homo PA6, homo PBT, and the polymer blends in water-absorbed state. Temperature dependencies of (a) the storage modulus and (b)  $\tan \delta$ .

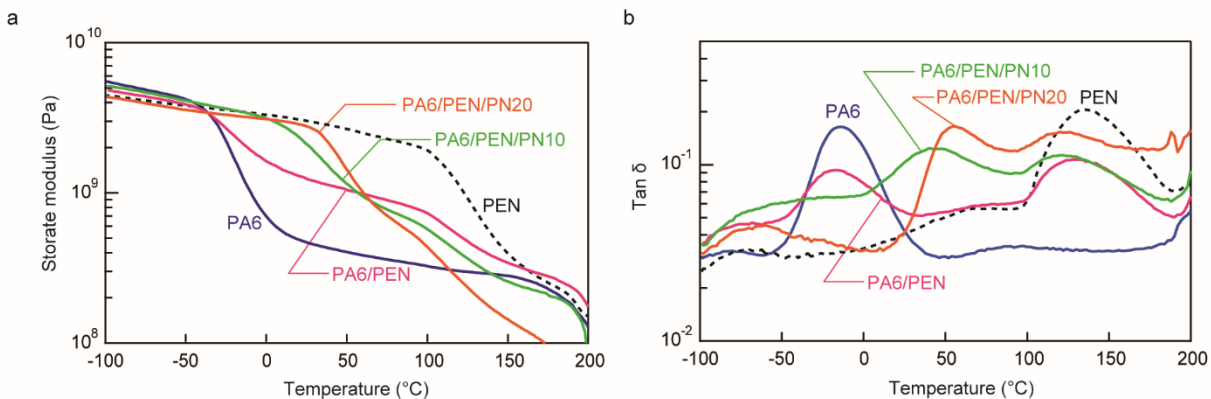

**Figure S5.** Viscoelastic behavior of homo PA6, homo PEN, and the polymer blends in water-absorbed state. Temperature dependencies of (a) the storage modulus and (b) tan  $\delta$ .

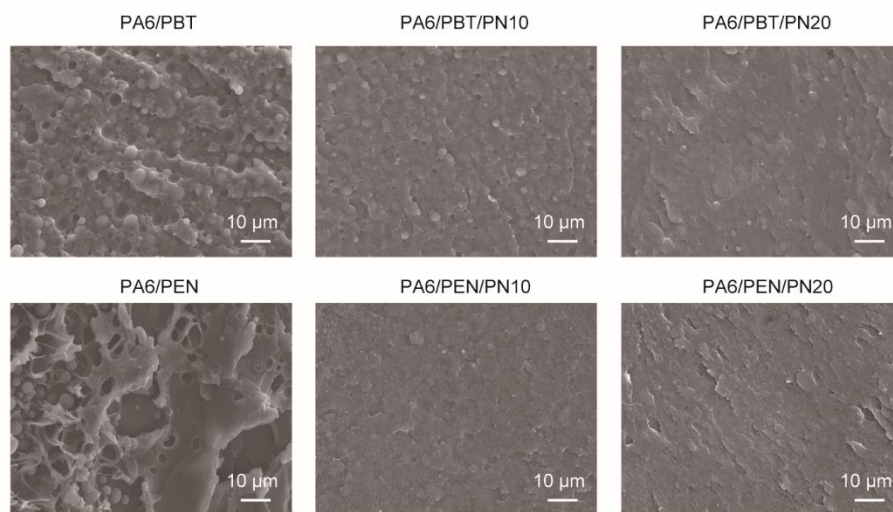

**Figure S6.** Scanning electron micrographs of the polymer blends. Compatibilization by PN loading is observed in both the PA6/PBT and PA6/PEN blends.

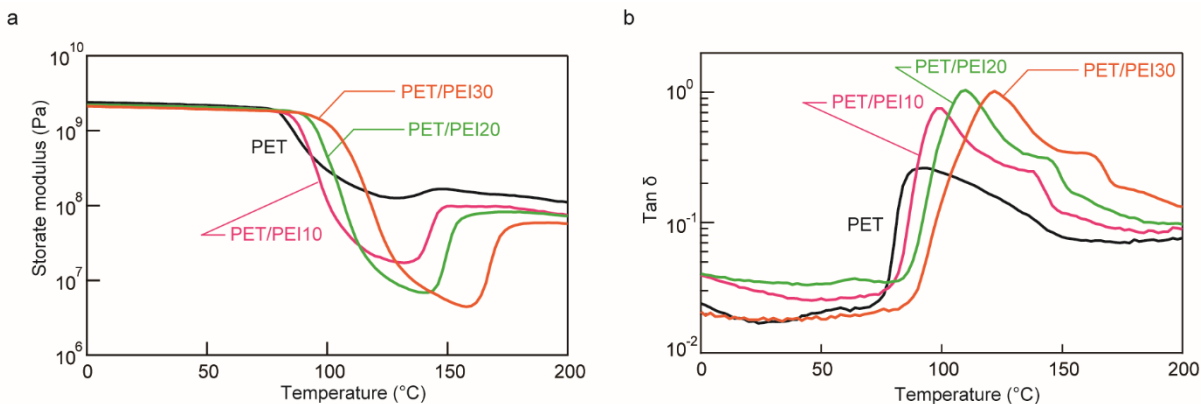

**Figure S7.** Viscoelastic behavior of homo PET and the PET/PEI blends. Temperature dependencies of (a) the storage modulus and (b)  $\tan \delta$ . PET/PEI blends present a single  $T_g$  and their miscibility is confirmed. Re-crystallization behavior is observed in all the specimens, owing to insufficient crystallinity of the prepared specimens.

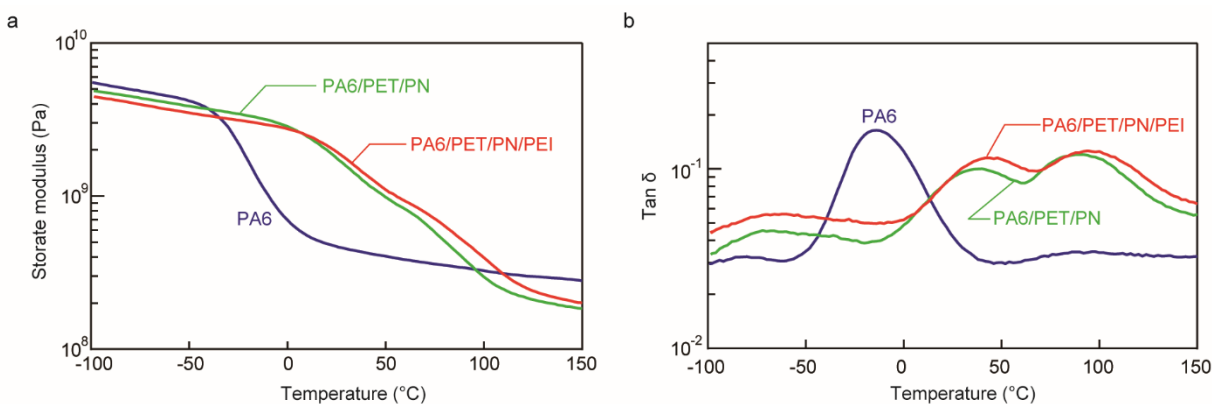

**Figure S8.** Viscoelastic behavior of the homo PA6, PA6/PET/PN ternary blend, and PA6/PET/PN/PEI quaternary blend in water-absorbed state. Temperature dependencies of (a) the storage modulus and (b)  $\tan \delta$ .

## EXPERIMENTAL

### Sample Preparation

#### *PA6/PBT Blends*

Standard-grade PA6 (A1030BRL, Unitika, Japan), PBT (Duranex 2002, Polyplastics, Japan), and heat-resistant-grade PN (PAPS PN70, Asahi Yukizai, Japan) were employed in this study. All the polymers were vacuum-dried prior to melt mixing. Melt mixing was conducted using an internal mixer (Laboplastomill, Toyo Seiki, Japan) with a cylinder temperature of 250 °C, rotation speed of 100 rpm, and mixing time of 5 min. The sample designations and composition ratios of the prepared blends are listed in Table S1.

#### *PA6/PEN Blends*

Standard-grade PA6 (A1030BRL, Unitika, Japan), PEN (Teonex TN-8065S, Teijin Limited, Japan), and heat-resistant-grade PN (PAPS PN70, Asahi Yukizai, Japan) were employed in this study. All the polymers were vacuum-dried prior to melt mixing. Melt mixing was conducted using an internal mixer (Labo Plastomill, Toyo Seiki Seisaku-sho, Japan) with a cylinder temperature of 290 °C, rotation speed of 100 rpm, and mixing time of 5 min. The sample designations and composition ratios of the prepared blends are listed in Table S1.

#### *PET/PEI Blends*

Standard-grade PEI (Ultem 1000, Sabic, Saudi Arabia) and injection-molding-grade PET (TRN-0855FF, Teijin Limited, Japan) were employed in this study. All the polymers were vacuum-dried prior to melt mixing. Melt mixing was conducted using a micro compounder (HAAKE Minilab,

Thermo Fisher Scientific, Germany) with a cylinder temperature of 270 °C, rotation speed of 200 rpm, and mixing time of 5 min. The sample designations and composition ratios of the prepared blends are listed in Table S1.

#### *PA6/PET/PN/PEI Blend*

Standard grade PA6 (A1030BRL, Unitika, Japan), PEI (Ultem 1000, Sabic, Saudi Arabia), injection-molding grade PET (TRN-0855FF, Teijin Limited, Japan), and heat-resistant grade PN (PAPS PN70, Asahi Yukizai, Japan) were employed in this study. All polymers were vacuum-dried prior to melt mixing. Melt mixing was conducted using an internal mixer (Labo Plastomill, Toyo Seiki Seisakusho, Japan) with a cylinder temperature of 270 °C, rotation speed of 100 rpm, and mixing time of 5 min. The sample designations and composition ratios of the prepared blends are listed in Table 1.

**Table S1.** Sample designations and constituent weight fractions

| Sample designation | PA6 (wt%) | PBT (wt%) | PEN (wt%) | PET (wt%) | PEI (wt%) | PN (wt%) |
|--------------------|-----------|-----------|-----------|-----------|-----------|----------|
| PA6/PBT            | 50        | 50        |           |           |           |          |
| PA6/PBT/PN10       | 45        | 45        |           |           |           | 10       |
| PA6/PBT/PN20       | 40        | 40        |           |           |           | 20       |
| PA6/PEN            | 50        |           | 50        |           |           |          |
| PA6/PEN/PN10       | 45        |           | 45        |           |           | 10       |
| PA6/PEN/PN20       | 40        |           | 40        |           |           | 20       |
| PET/PEI10          | 90        |           |           |           | 10        |          |
| PET/PEI20          | 80        |           |           |           | 20        |          |
| PET/PEI30          | 70        |           |           |           | 30        |          |
| PA6/PET/PN/PEI     | 40        |           |           | 40        | 10        | 10       |

### **Dynamic Mechanical Analysis (DMA) at Water-Absorbed State**

The homo polymers and melt-mixed samples were melt-pressed into rectangular specimens (35 mm × 5 mm × 0.5 mm) using a laboratory press at temperatures of 250, 270, and 290 °C for the polymer blends comprising PBT, PET, and PEN, respectively. The specimens were cooled by a second laboratory press at 150 °C to promote crystallization of the specimens by slow cooling. The specimens listed in Figure S6 were vacuum-dried at 80 °C for 12 h prior to measurement. The other specimens were immersed in distilled water at 23 °C overnight before measurement. DMA was carried out using a dynamic mechanical analyzer (DVA-225, ITK, Japan) in the temperature range -100–200 °C with a heating rate of 5 °C/min and a frequency of 10 Hz.

### **Scanning Electron Microscopy (SEM)**

The cryo-fractured surfaces of the polymer blends were fabricated by fracturing the rectangular specimens (50 mm × 10 mm × 2 mm) in liquid nitrogen. Each fractured surface was sputter-coated with platinum and observed by SEM (S-3600N, Hitachi, Japan) at an accelerating voltage of 15 kV.
